# Supplementary material for: Multidrug resistant pathogens respond differently to the presence of co-pathogen, commensal, probiotic and host cells
Source: PubMed Central journal article supplement (PMC5988826; doi:10.1038/s41598-018-26738-1), 2018-06-05

**Multidrug resistant pathogens respond differently to the presence of co-pathogens, commensals, probiotics and host cells**

Agnes P. Chan<sup>1†\*</sup>, Yongwook Choi<sup>1†</sup>, Lauren M. Brinkac<sup>1</sup>, Radha Krishnakumar<sup>1</sup>, Jessica DePew<sup>1</sup>, Maria Kim<sup>1</sup>, Mary K. Hinkle<sup>2</sup>, Emil P. Lesho<sup>2,3^</sup>, and Derrick E. Fouts<sup>1\*</sup>

<sup>1</sup>J. Craig Venter Institute (JCVI), 9605 Medical Center Drive, Suite 150, Rockville, MD 20850, United States

<sup>2</sup>Multidrug-resistant organism Repository and Surveillance Network, Bacterial Diseases Branch, Walter Reed Army Institute of Research, Silver Spring, MD 20910, United States

<sup>3</sup>Infectious Diseases Unit, Rochester Regional Health, Rochester, NY, 14621

<sup>^</sup> Current affiliation

\*corresponding authors: [dfouts@jcv.org](mailto:dfouts@jcv.org), [achan@jcv.org](mailto:achan@jcv.org)

<sup>†</sup>these authors contributed equally to this work

**Figure S1. Growth of *S. epidermidis* and *E. hormaechei* in co-culture and mono-culture.** *S. epidermidis* colonies were selected for by growth on phenylethyl-alcohol agar from co-culture with *E. hormaechei* (blue), or mono-culture (red). *E. hormaechei* colonies were selected for by growth on Hektoen Enteric agar from co-culture with *S. epidermidis* (green), or mono-culture (purple). Co-culture datapoints are denoted with diamonds while monoculture datapoints with Xs.

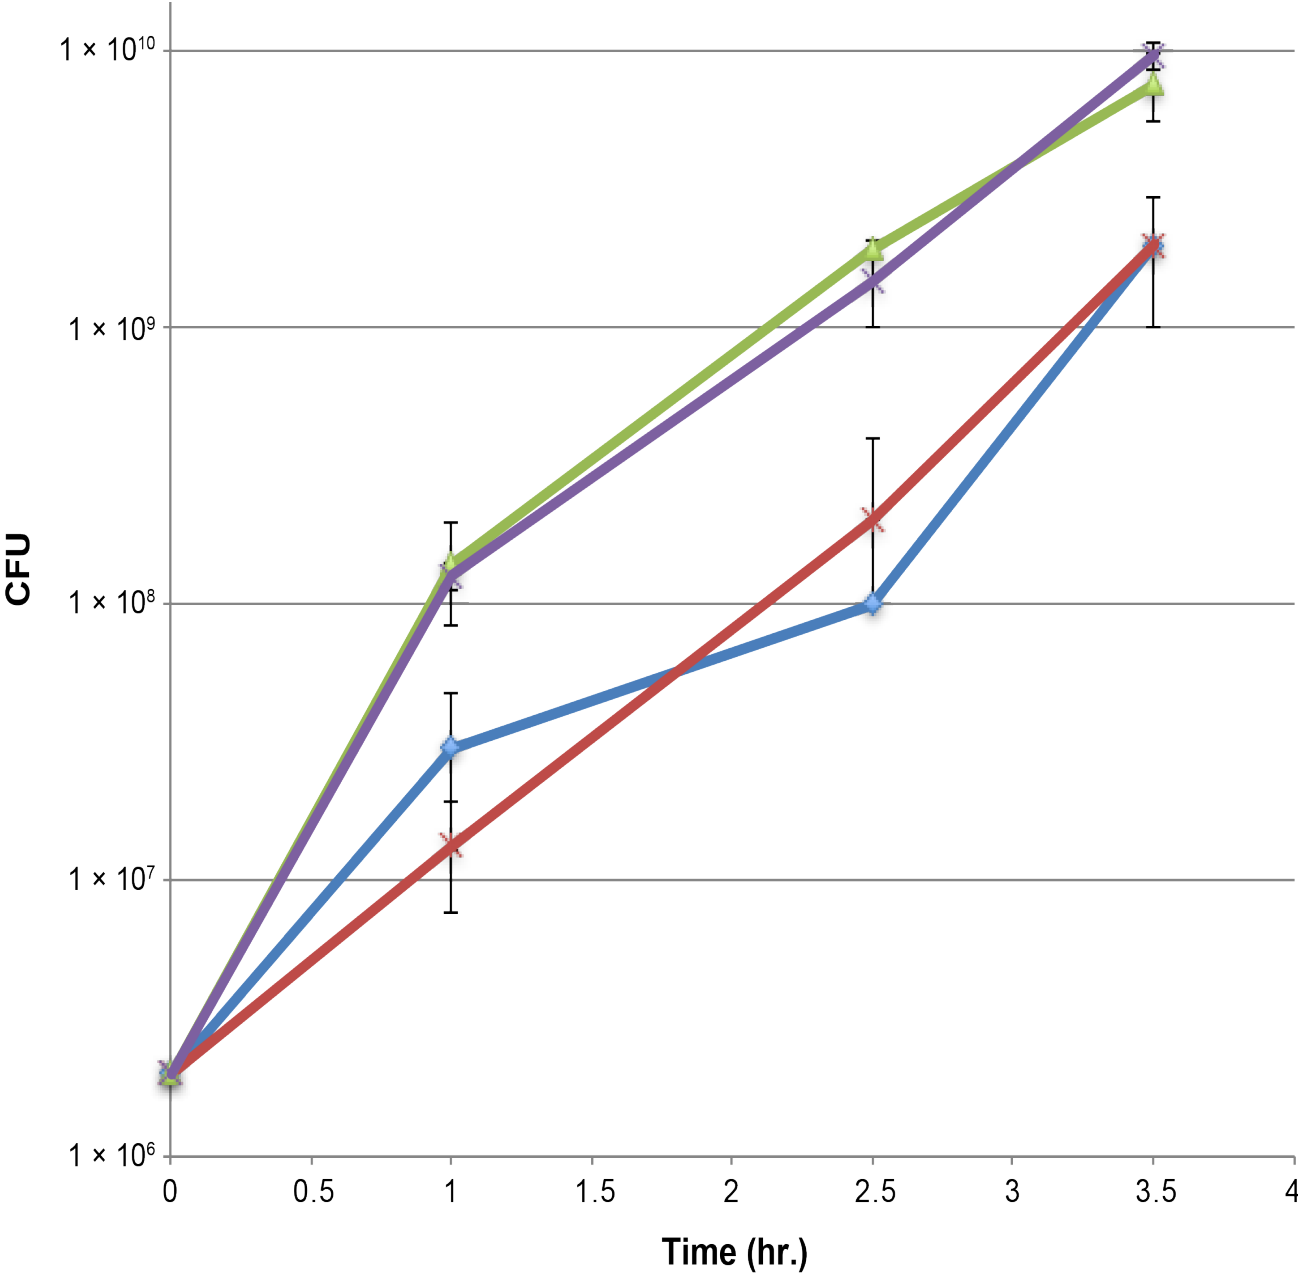

**Figure S2. Top gene responses of *A. baumannii* when co-cultured independently with *E. hormaechei* or *K. pneumoniae*.**

Genes with at least 4-fold up or down expression and FDR above 5% in at least one co-culture are shown.

| NCBI annotation |                                                           |                | Symbol | AB vs. EH           |     | AB vs. KP           |     |
|-----------------|-----------------------------------------------------------|----------------|--------|---------------------|-----|---------------------|-----|
| Locus tag       | Product                                                   | Protein id     |        | log <sub>2</sub> FC | FDR | log <sub>2</sub> FC | FDR |
| T634_RS01410    | aldehyde dehydrogenase                                    | WP_001269058.1 |        | 3.60                | ●   | 3.62                | ●   |
| T634_RS01395    | alcohol dehydrogenase                                     | WP_000874704.1 |        | 3.56                | ●   | 3.60                | ●   |
| T634_RS06340    | lipoyl synthase                                           | WP_000364558.1 | lipA   | 3.41                | ●   | 3.57                | ●   |
| T634_RS10775    | gamma-aminobutyraldehyde dehydrogenase                    | WP_001140777.1 |        | 3.24                | ●   | 2.40                | ●   |
| T634_RS06355    | diaminohydroxyphosphoribosylaminopyrimidine deaminase     | WP_001289728.1 |        | 2.98                | ●   | 2.90                | ●   |
| T634_RS06345    | ABC transporter substrate-binding protein                 | WP_001177517.1 | acoA   | 2.89                | ●   | 3.04                | ●   |
| T634_RS06350    | alpha-ketoacid dehydrogenase subunit beta                 | WP_001133051.1 | acoB   | 2.85                | ●   | 2.90                | ●   |
| T634_RS17975    | acetate kinase                                            | WP_000236000.1 | ackA   | 2.83                | ●   | 2.78                | ●   |
| T634_RS08500    | hypothetical protein                                      | WP_001991318.1 |        | 2.83                | ●   | 0.12                | ●   |
| T634_RS06360    | dihydrolipoyl dehydrogenase                               | WP_001287542.1 | lpdA   | 2.76                | ●   | 2.75                | ●   |
| T634_RS10780    | polyketide cyclase                                        | WP_001041177.1 |        | 2.72                | ●   | 1.92                | ●   |
| T634_RS18375    | NAD(P)(+) transhydrogenase (Re/Si-specific) subunit alpha | WP_001165468.1 |        | 2.72                | ●   | 2.70                | ●   |
| T634_RS18380    | NAD(P) transhydrogenase subunit alpha                     | WP_000230434.1 |        | 2.68                | ●   | 2.65                | ●   |
| T634_RS08960    | isocitrate lyase                                          | WP_000214787.1 |        | 2.61                | ●   | 2.73                | ●   |
| T634_RS18385    | NAD(P) transhydrogenase subunit beta                      | WP_000394405.1 | pntB   | 2.55                | ●   | 2.50                | ●   |
| T634_RS17970    | phosphate acetyltransferase                               | WP_001092295.1 | pta    | 2.51                | ●   | 2.63                | ●   |
| T634_RS08515    | heme oxygenase                                            | WP_001089060.1 |        | 2.49                | ●   | -0.22               | ●   |
| T634_RS08505    | DUF560 domain-containing protein                          | WP_000831634.1 |        | 2.41                | ●   | -0.21               | ●   |
| T634_RS08495    | hypothetical protein                                      | WP_004715426.1 |        | 2.39                | ●   | -0.45               | ●   |
| T634_RS08510    | energy transducer TonB                                    | WP_000837763.1 |        | 2.07                | ●   | -0.56               | ●   |
| T634_RS16990    | cation acetate symporter                                  | WP_000871885.1 | actP   | 2.01                | ●   | 2.06                | ●   |
| T634_RS16995    | DUF485 domain-containing protein                          | WP_000372818.1 |        | 1.98                | ●   | 2.09                | ●   |
| T634_RS08910    | esterase                                                  | WP_000697203.1 |        | 1.97                | ●   | 2.05                | ●   |
| T634_RS13075    | sulfate ABC transporter substrate-binding protein         | WP_001212600.1 | sbp    | 1.66                | ●   | 2.28                | ●   |
| T634_RS05115    | taurine ABC transporter permease                          | WP_001092656.1 |        | 1.66                | ●   | 2.03                | ●   |
| T634_RS04825    | hypothetical protein                                      | WP_000108365.1 |        | -1.27               | ●   | -2.27               | ●   |
| T634_RS14335    | acyl-CoA dehydrogenase                                    | WP_001160766.1 |        | -1.96               | ●   | -2.08               | ●   |
| T634_RS14345    | enoyl-CoA hydratase/isomerase family protein              | WP_001091033.1 |        | -2.02               | ●   | -2.11               | ●   |
| T634_RS14340    | enoyl-CoA hydratase                                       | WP_001198691.1 |        | -2.03               | ●   | -1.97               | ●   |
| T634_RS14355    | N-acylhomoserine lactone synthase                         | WP_001020940.1 |        | -2.09               | ●   | -2.09               | ●   |
| T634_RS03745    | DUF2280 domain-containing protein                         | WP_000113266.1 |        | -2.13               | ●   | -2.14               | ●   |
| T634_RS10710    | EamA family transporter                                   | WP_001018285.1 |        | -2.30               | ●   | -1.05               | ●   |
| T634_RS14350    | MFS transporter                                           | WP_001193286.1 |        | -2.33               | ●   | -2.53               | ●   |
| T634_RS14320    | methylmalonate-semialdehyde dehydrogenase (CoA acylating) | WP_001092394.1 | mmsA   | -2.34               | ●   | -2.44               | ●   |
| T634_RS14725    | penicillin G amidase                                      | WP_000935120.1 |        | -2.36               | ●   | -2.34               | ●   |
| T634_RS14720    | 3-oxoadipate enol-lactonase                               | WP_001138966.1 | pcaD   | -2.37               | ●   | -2.37               | ●   |
| T634_RS14325    | 3-hydroxyisobutyrate dehydrogenase                        | WP_001017291.1 | mmsB   | -2.43               | ●   | -2.77               | ●   |
| T634_RS14330    | AMP-binding protein                                       | WP_000969576.1 |        | -2.44               | ●   | -2.82               | ●   |
| T634_RS01875    | dicarboxylate/amino acid:cation symporter                 | WP_000347180.1 | dctA   | -2.51               | ●   | -2.31               | ●   |
| T634_RS14700    | catechol 1,2-dioxygenase                                  | WP_001081618.1 | catA   | -2.89               | ●   | -2.77               | ●   |
| T634_RS14805    | outer membrane porin, OprD family                         | WP_000421436.1 |        | -3.05               | ●   | -2.90               | ●   |
| T634_RS14690    | muconate cycloisomerase                                   | WP_001986121.1 | catB   | -3.28               | ●   | -2.91               | ●   |
| T634_RS14695    | muconolactone delta-isomerase                             | WP_000897235.1 | catC   | -3.32               | ●   | -3.28               | ●   |
| T634_RS14800    | MFS transporter                                           | WP_001076622.1 |        | -3.33               | ●   | -3.13               | ●   |

Figure S3. Top gene responses of *K. pneumoniae* when co-cultured independently with *A. baumannii* or *E. hormaechei*.

Genes with at least 4-fold up or down expression and FDR above 5% in at least one co-culture are shown.

| NCBI annotation |                                                    |                | Symbol | Virulence annotation (This study) |              |       | KP vs. AB           |      | KP vs. EH           |     |
|-----------------|----------------------------------------------------|----------------|--------|-----------------------------------|--------------|-------|---------------------|------|---------------------|-----|
| Locus tag       | Product                                            | Protein id     |        | Category                          | Description  | Other | log <sub>2</sub> FC | FDR  | log <sub>2</sub> FC | FDR |
| T643_RS07920    | TonB-dependent receptor                            | WP_032434976.1 |        |                                   |              | 3.49  | 0.02                | 4.02 |                     |     |
| T643_RS07935    | iron ABC transporter permease                      | WP_004174663.1 |        |                                   |              | 3.27  | 0.46                | 4.46 |                     |     |
| T643_RS07930    | hemin ABC transporter substrate-binding protein    | WP_004181072.1 | hmuT   |                                   |              | 3.18  | 1.01                | 4.01 |                     |     |
| T643_RS07925    | hemin-degrading factor                             | WP_032434978.1 | hmuS   |                                   |              | 3.16  | 0.92                | 4.92 |                     |     |
| T643_RS07800    | hydrogenase nickel incorporation protein HypA      | WP_032412123.1 | hypA   |                                   |              | 3.86  | 0.01                | 4.01 |                     |     |
| T643_RS07795    | formate hydrogenlyase regulatory protein HycA      | WP_002914925.1 | hycA   |                                   |              | 3.35  | 4.56                | 4.56 |                     |     |
| T643_RS12575    | phosphatase                                        | WP_009483944.1 |        |                                   |              | 3.34  | 0.22                | 0.22 |                     |     |
| T643_RS07940    | heme ABC transporter ATP-binding protein           | WP_004149516.1 | hmuV   |                                   |              | 3.37  | 0.23                | 0.23 |                     |     |
| T643_RS12570    | DUF1348 domain-containing protein                  | WP_016529674.1 |        |                                   |              | 3.37  | 0.10                | 0.10 |                     |     |
| T643_RS07915    | hypothetical protein                               | WP_002915045.1 |        |                                   |              | 3.34  | 0.49                | 0.49 |                     |     |
| T643_RS00915    | NarK family nitrate/nitrite MFS transporter        | WP_004175568.1 | narK   |                                   |              | 3.29  | 0.42                | 0.42 |                     |     |
| T643_RS07500    | class 1b ribonucleoside-diphosphate reductase s    | WP_032434956.1 | nrdF   |                                   |              | 3.93  | 0.86                | 0.86 |                     |     |
| T643_RS07490    | class 1b ribonucleoside-diphosphate reductase as   | WP_002914321.1 | nrdI   |                                   |              | 3.80  | 1.05                | 1.05 |                     |     |
| T643_RS07485    | NrdH-redoxin                                       | WP_002914320.1 | nrdH   |                                   |              | 3.70  | 1.11                | 1.11 |                     |     |
| T643_RS07495    | class 1b ribonucleoside-diphosphate reductase s    | WP_032434955.1 | nrdE   |                                   |              | 3.69  | 1.02                | 1.02 |                     |     |
| T643_RS12565    | alkylhydroperoxidase                               | WP_004145017.1 |        |                                   |              | 3.35  | 0.25                | 0.25 |                     |     |
| T643_RS26565    | hypothetical protein                               | WP_047682061.1 |        |                                   |              | 3.30  | 2.84                | 2.84 |                     |     |
| T643_RS26185    | catecholate siderophore receptor Fiu               | WP_032434366.1 | fiu    |                                   |              | 3.28  | 1.08                | 1.08 |                     |     |
| T643_RS24620    | antirestriction protein ArdA                       | WP_015065510.1 |        |                                   |              | 3.21  | 1.15                | 1.15 |                     |     |
| T643_RS07790    | formate hydrogenlyase subunit 2                    | WP_004151047.1 | hyfA   |                                   |              | 3.19  | 0.49                | 0.49 |                     |     |
| T643_RS26320    | YmiA family putative membrane protein              | WP_002901776.1 |        |                                   |              | 3.17  | 1.83                | 1.83 |                     |     |
| T643_RS07910    | acetolactate synthase                              | WP_032434974.1 |        |                                   |              | 3.14  | 0.09                | 0.09 |                     |     |
| T643_RS01280    | bifunctional threonine ammonia-lyase/L-serine am   | WP_002910762.1 | tdcB   |                                   |              | 3.10  | 1.71                | 1.71 |                     |     |
| T643_RS03365    | periplasmic protein                                | WP_047680786.1 |        |                                   |              | 3.02  | 1.74                | 1.74 |                     |     |
| T643_RS21130    | catecholate siderophore receptor CirA              | WP_002912926.1 | cirA   |                                   |              | 2.96  | 2.36                | 2.36 |                     |     |
| T643_RS03815    | isochorismate synthase EntC                        | WP_004176916.1 | entC   | Siderophores                      | Enterobactin | entC  | 2.54                | 2.54 |                     |     |
| T643_RS03820    | 2,3-dihydroxybenzoate-AMP ligase                   | WP_012068426.1 |        | Siderophores                      | Enterobactin | entE  | 2.21                | 2.77 |                     |     |
| T643_RS23530    | head completion/stabilization protein              | WP_002896151.1 |        |                                   |              | 2.07  | 2.57                | 2.57 |                     |     |
| T643_RS03835    | proofreading thioesterase EntH                     | WP_002893892.1 |        |                                   |              | 1.99  | 2.35                | 2.35 |                     |     |
| T643_RS03830    | 2,3-dihydro-2,3-dihydroxybenzoate dehydrogenas     | WP_023159213.1 |        | Siderophores                      | Enterobactin | entA  | 1.99                | 2.66 |                     |     |
| T643_RS03825    | isochorismatase                                    | WP_021313366.1 | entB   | Siderophores                      | Enterobactin | entB  | 1.90                | 2.96 |                     |     |
| T643_RS03775    | enterochelin esterase                              | WP_040169968.1 | fes    | Siderophores                      | Enterobactin | fes   | 1.90                | 2.47 |                     |     |
| T643_RS03780    | invasin                                            | WP_004178967.1 |        | Siderophores                      | Enterobactin | mbtH  | 1.87                | 2.63 |                     |     |
| T643_RS15710    | hypothetical protein                               | WP_002906780.1 |        |                                   |              | 1.86  | 2.01                | 2.01 |                     |     |
| T643_RS03765    | enterobactin synthase subunit EntD                 | WP_032434174.1 |        | Siderophores                      | Enterobactin | entD  | 1.80                | 2.31 |                     |     |
| T643_RS19350    | citrate/sodium symporter CitN                      | WP_023282163.1 | citS   |                                   |              | 1.70  | 2.37                | 2.37 |                     |     |
| T643_RS03770    | TonB-dependent siderophore receptor                | WP_004210903.1 | fepA_1 | Siderophores                      | Enterobactin | fepA  | 1.70                | 2.73 |                     |     |
| T643_RS03805    | enterobactin transporter EntS                      | WP_004147525.1 |        | Siderophores                      | Enterobactin | entS  | 1.62                | 2.77 |                     |     |
| T643_RS19355    | [citrate (pro-3S)-lyase] ligase                    | WP_032435569.1 | citC   |                                   |              | 1.59  | 2.06                | 2.06 |                     |     |
| T643_RS23550    | hypothetical protein                               | WP_047681893.1 |        |                                   |              | 1.55  | 2.39                | 2.39 |                     |     |
| T643_RS03785    | enterobactin synthase subunit F                    | WP_047680809.1 | entF   | Siderophores                      | Enterobactin | entF  | 1.45                | 2.70 |                     |     |
| T643_RS03800    | iron-enterobactin transporter membrane protein     | WP_047680815.1 | fepD   | Siderophores                      | Enterobactin | fepD  | 1.42                | 2.23 |                     |     |
| T643_RS19360    | citrate lyase ACP                                  | WP_004151373.1 | citD   |                                   |              | 1.40  | 2.62                | 2.62 |                     |     |
| T643_RS19365    | citrate lyase subunit beta                         | WP_004151372.1 | citE   |                                   |              | 1.38  | 2.55                | 2.55 |                     |     |
| T643_RS01335    | TonB-dependent siderophore receptor                | WP_032434771.1 |        |                                   |              | 1.19  | 2.63                | 2.63 |                     |     |
| T643_RS19370    | citrate lyase subunit alpha                        | WP_032433050.1 | citF   |                                   |              | 1.17  | 2.54                | 2.54 |                     |     |
| T643_RS19335    | sodium ion-translocating decarboxylase subunit b   | WP_023316443.1 | oadB   |                                   |              | 1.14  | 2.64                | 2.64 |                     |     |
| T643_RS16995    | ribose ABC transporter ATP-binding protein         | WP_002885156.1 |        |                                   |              | 1.21  | 2.03                | 2.03 |                     |     |
| T643_RS19260    | Na <sup>+</sup> /H <sup>+</sup> antiporter NhaA    | WP_032433058.1 | nhaA   |                                   |              | 1.22  | 2.00                | 2.00 |                     |     |
| T643_RS07880    | manganese transporter                              | WP_009485519.1 |        |                                   |              | 1.33  | 2.03                | 2.03 |                     |     |
| T643_RS07885    | metal ABC transporter permease                     | WP_004145794.1 | sitC   |                                   |              | 1.35  | 2.01                | 2.01 |                     |     |
| T643_RS18585    | ethanolamine utilization protein EutN              | WP_004182807.1 |        |                                   |              | 1.84  | 6.63                | 6.63 |                     |     |
| T643_RS19340    | oxaloacetate decarboxylase subunit alpha           | WP_023282162.1 | oadA   |                                   |              | 1.86  | 3.56                | 3.56 |                     |     |
| T643_RS19345    | oxaloacetate decarboxylase subunit gamma           | WP_011977638.1 |        |                                   |              | 1.94  | 3.85                | 3.85 |                     |     |
| T643_RS00795    | oligopeptide ABC transporter permease OppC         | WP_004145396.1 | oppC   |                                   |              | 2.04  | 0.32                | 0.32 |                     |     |
| T643_RS11485    | 4-aminobutyrate-2-oxoglutarate transaminase        | WP_002920814.1 | gabT_2 |                                   |              | 2.04  | 0.29                | 0.29 |                     |     |
| T643_RS09285    | short chain dehydrogenase                          | WP_002916526.1 |        |                                   |              | 2.07  | 0.58                | 0.58 |                     |     |
| T643_RS22620    | phosphoribosylformylglycinamide synthase           | WP_031588782.1 | purL   |                                   |              | 2.10  | 0.81                | 0.81 |                     |     |
| T643_RS19850    | bifunctional aconitate hydratase 2/2-methylisocitr | WP_074421634.1 | acnB   |                                   |              | 2.12  | 0.82                | 0.82 |                     |     |
| T643_RS11865    | dipeptide ABC transporter permease DppC            | WP_004145207.1 | dppC   |                                   |              | 2.12  | 1.60                | 1.60 |                     |     |
| T643_RS12885    | phosphoribosylamine-glycine ligase                 | WP_002884357.1 | purD   |                                   |              | 2.13  | 0.86                | 0.86 |                     |     |
| T643_RS00390    | 3-(3-hydroxyphenyl)propionate hydroxylase          | WP_032434708.1 | mhpA   |                                   |              | 2.15  | 0.81                | 0.81 |                     |     |
| T643_RS13260    | CoA transferase subunit B                          | WP_002908192.1 |        |                                   |              | 2.20  | 1.39                | 1.39 |                     |     |
| T643_RS09290    | alpha/beta hydrolase                               | WP_004174434.1 |        |                                   |              | 2.24  | 1.16                | 1.16 |                     |     |
| T643_RS01665    | formate-dependent phosphoribosylglycinamide fo     | WP_004151450.1 | purT   |                                   |              | 2.36  | 0.69                | 0.69 |                     |     |
| T643_RS12890    | bifunctional phosphoribosylaminoimidazolecarbony   | WP_004178254.1 | purH   |                                   |              | 2.48  | 0.97                | 0.97 |                     |     |
| T643_RS15470    | VOC family protein                                 | WP_002906451.1 |        |                                   |              | 2.81  | 0.84                | 0.84 |                     |     |
| T643_RS14390    | ABC transporter                                    | WP_073553711.1 |        |                                   |              | 3.04  | 1.90                | 1.90 |                     |     |

**Figure S4. Top gene responses of *E. hormaechei* when co-cultured independently with *A. baumannii* or *K. pneumoniae*.**

Genes with at least 4-fold up or down expression and FDR above 5% in at least one co-culture are shown.

| NCBI annotation |                                                   |                | Symbol | Virulence annotation (This study) |              |       | EH vs. AB           |     | EH vs. KP           |     |
|-----------------|---------------------------------------------------|----------------|--------|-----------------------------------|--------------|-------|---------------------|-----|---------------------|-----|
| Locus tag       | Product                                           | Protein id     |        | Category                          | Description  | Other | log <sub>2</sub> FC | FDR | log <sub>2</sub> FC | FDR |
| T636_RS04035    | ligand-gated channel protein                      | WP_045350507.1 |        |                                   |              |       | 5.01                | ●   | 3.09                | ●   |
| T636_RS04030    | Hemin uptake protein                              | WP_015570723.1 |        |                                   |              |       | 4.89                | ●   | 3.52                | ●   |
| T636_RS04045    | hemin ABC transporter substrate-binding protein   | WP_022650910.1 | hmuT   |                                   |              |       | 4.36                | ●   | 2.63                | ●   |
| T636_RS11800    | 2,3-dihydroxybenzoate-AMP ligase                  | WP_047654086.1 |        | Siderophores                      | Enterobactin | entE  | 4.30                | ●   | 2.70                | ●   |
| T636_RS04040    | hemin-degrading factor                            | WP_022650911.1 | hmuS   |                                   |              |       | 4.22                | ●   | 2.69                | ●   |
| T636_RS04050    | iron ABC transporter permease                     | WP_045336621.1 |        |                                   |              |       | 4.20                | ●   | 2.38                | ●   |
| T636_RS11805    | isochorismate synthase EntC                       | WP_023324292.1 | entC   | Siderophores                      | Enterobactin | entC  | 4.18                | ●   | 2.56                | ●   |
| T636_RS07205    | ligand-gated channel protein                      | WP_045896695.1 |        |                                   |              |       | 4.12                | ●   | 2.23                | ●   |
| T636_RS11795    | isochorismatase                                   | WP_017382510.1 | entB   | Siderophores                      | Enterobactin | entB  | 3.79                | ●   | 2.27                | ●   |
| T636_RS11790    | 2,3-dihydro-2,3-dihydroxybenzoate dehydrogenase   | WP_059585462.1 |        | Siderophores                      | Enterobactin | entA  | 3.38                | ●   | 2.10                | ●   |
| T636_RS11845    | enterochelin esterase                             | WP_045350568.1 | fes    | Siderophores                      | Enterobactin | fes   | 3.30                | ●   | 2.44                | ●   |
| T636_RS11840    | hypothetical protein                              | WP_003858806.1 |        | Siderophores                      | Enterobactin | mbtH  | 3.26                | ●   | 2.34                | ●   |
| T636_RS11785    | proofreading thioesterase EntH                    | WP_015571173.1 |        |                                   |              |       | 3.21                | ●   | 1.77                | ●   |
| T636_RS11850    | TonB-dependent siderophore receptor               | WP_047654088.1 | fepA   | Siderophores                      | Enterobactin | fepA  | 3.17                | ●   | 2.22                | ●   |
| T636_RS11835    | enterobactin synthase subunit F                   | WP_047654087.1 | entF   | Siderophores                      | Enterobactin | entF  | 3.08                | ●   | 2.02                | ●   |
| T636_RS19095    | hypothetical protein                              | WP_047654473.1 |        |                                   |              |       | 2.63                | ●   | 1.77                | ●   |
| T636_RS12020    | enterochelin esterase                             | WP_045332430.1 |        |                                   |              |       | 2.34                | ●   | 1.20                | ●   |
| T636_RS01165    | aerobactin synthase lucA                          | WP_047653418.1 | iucA   | Siderophores                      | Aerobactin   | iucA  | 2.27                | ●   | 1.44                | ●   |
| T636_RS01185    | TonB-dependent siderophore receptor               | WP_023324924.1 |        | Siderophores                      | Aerobactin   | iutA  | 2.11                | ●   | 1.35                | ●   |
| T636_RS04055    | heme ABC transporter ATP-binding protein          | WP_032658174.1 | hmuV   |                                   |              |       | 2.06                | ●   | 0.93                | ●   |
| T636_RS01175    | lucA/lucC family siderophore biosynthesis protein | WP_023324922.1 |        | Siderophores                      | Aerobactin   | iucC  | 2.06                | ●   | 1.52                | ●   |
| T636_RS01170    | N-acetyltransferase                               | WP_023314431.1 |        | Siderophores                      | Aerobactin   | iucB  | 2.06                | ●   | 1.39                | ●   |
| T636_RS18005    | nitrite reductase small subunit NirD              | WP_015571429.1 | nirD   |                                   |              |       | 2.05                | ●   | 0.43                | ●   |
| T636_RS01180    | lysine 6-monooxygenase                            | WP_047653419.1 | iucD   | Siderophores                      | Aerobactin   | iucD  | 2.04                | ●   | 1.38                | ●   |
| T636_RS15175    | hypothetical protein                              | WP_003862457.1 |        |                                   |              |       | -2.13               | ●   | -0.20               | ●   |

**Figure S5. Validation of Differentially Expressed genes.** Lines indicated logFC (base 2) expression from edgeR analysis of RNA-Seq data, and bars indicate logFC (base 2) expression as measured by qPCR. Blue bars are *K. pneumoniae* genes, and gray bars are *A. baumannii* genes. x-axis labels showed: organism, locus tag, and gene name, followed by the co-culture assay in brackets. Key: *K. pneumoniae* (KP), *A. baumannii* (AB), *E. hormaechei* (EH), *L. reuteri* (LR), *S. epidermidis* (SE) and *C. jeikeium* (CJ).

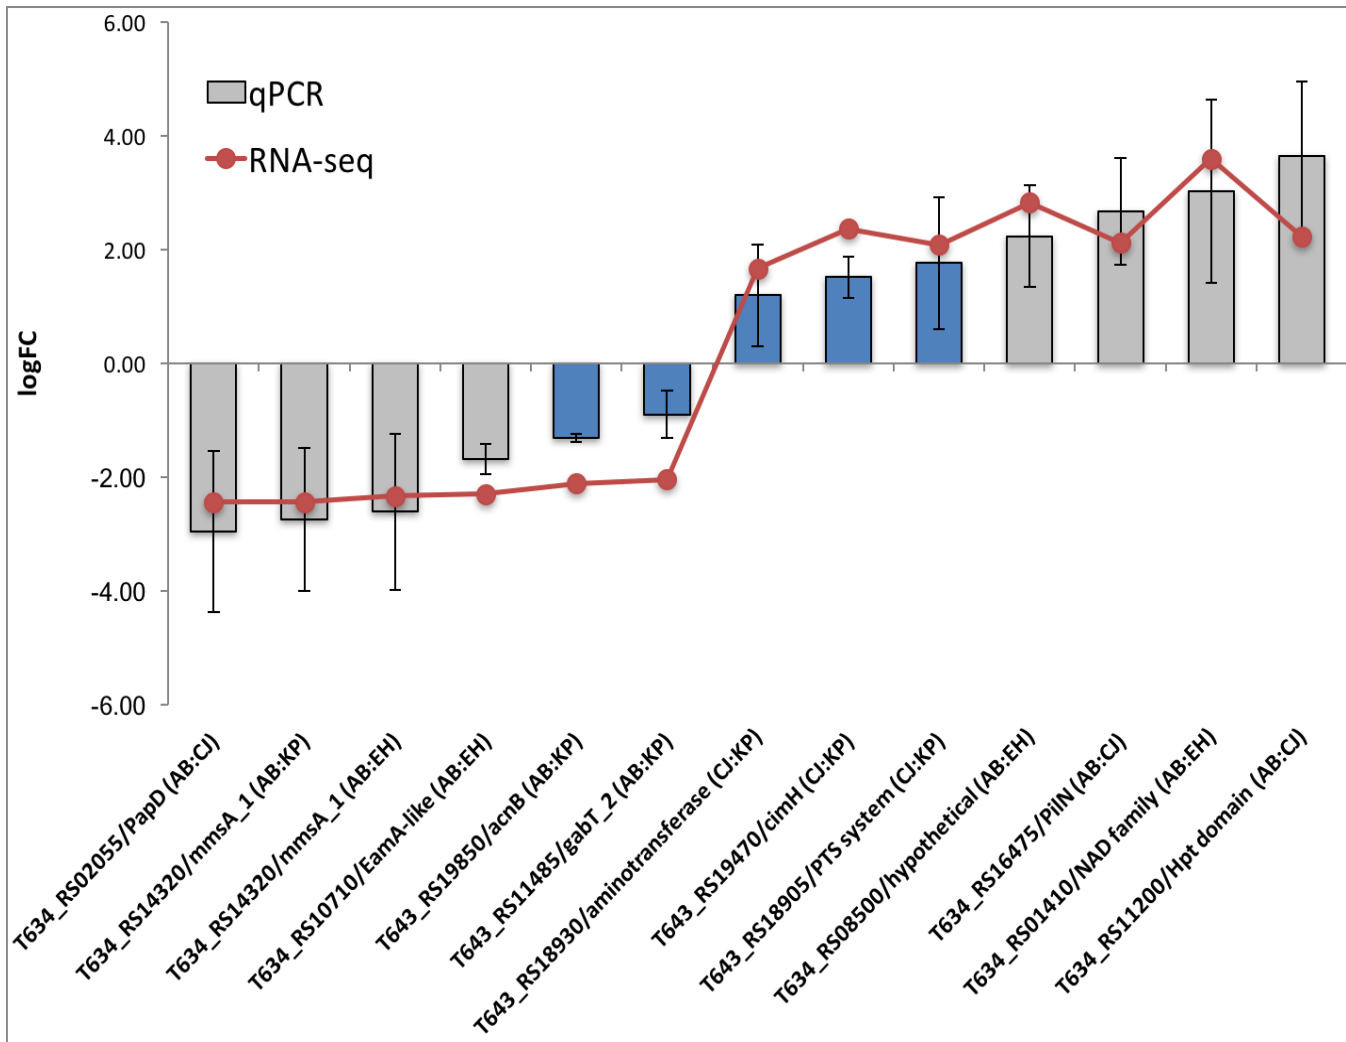

**Figure S6. Mapping of upregulated human host genes to the TNF signaling pathway (KEGG) shared across MDRO and HDF co-culture assays.**

A total of 11 out of 17 up-regulated human genes (red star) belonged to the TNF signaling pathway as shown in the KEGG pathway image (KEGG, [http://www.genome.jp/kegg-bin/show\\_pathway?hsa04668](http://www.genome.jp/kegg-bin/show_pathway?hsa04668)).

**TNF SIGNALING PATHWAY**

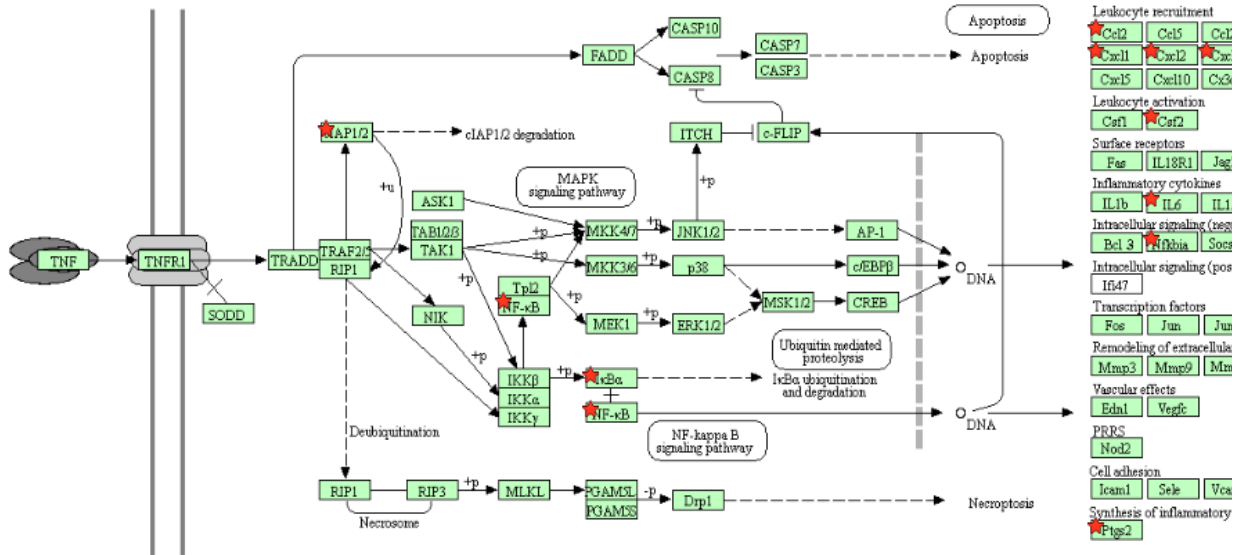

Supplement: 41598_2018_26738_MOESM2_ESM.pdf [file 41598_2018_26738_MOESM2_ESM.pdf]
